# Supplementary material for: Novel hybrid hetero-sandwich architectures via stoichiometric control of host–guest self-organization
Source: Royal Society of Chemistry journal article supplement (doi:10.1039/b313846a), 2004-01-01
Supplement: b313846a.doc [file b313846a.doc]

**Supporting materials**

(1) **Chemical preparations:**

All chemicals were reagent grade and were used without further purification.

Compound **1:** An aqueous solution (10ml) of 1,1’-dimethyl-4,4’-bipyridinium dichloride hydrate (0.155g, 0.5mmol) was slowly added to a solution of KSCN (0.291g, 3mmol) and 3CdSO48H2O (0.085g, 0.111mmol) in distilled water (15ml), the resulting solution was allowed to stand for 72 hours. The resulting yellow crystalline precipitate was filtered and dried for the crystallographic study. Compound **2** was obtained by following a similar process but with a more amount of 3CdSO48H2O (0.256g, 0.333mmol) as colorless crystals.

(2) **Crystal data and details of determinations**

Crystal data for **1** (0.5 x 0.4 x 0.25 mm), monoclinic, P21/c, *a*=11.728(1), *b*=13.294(1), *c=*13.240(1)Å, =93.79(1) *V=*2059.9(2)Å3, *Z*=4, *ρ*calcd=1.712 mg/m3, *R*1= 0.043, *wR*2= 0.126 (17230 reflections total, 3620 unique, 3350 (*I*>2(*I*)), goodness-of-fit =1.07. Crystal data for **2** (0.3 x 0.26 x 0.1 mm)**,** triclinic, *P*-1 (no. 2), *a*=11.4079(8), *b*=12.7469(10), *c*=15.7543(10) Å, *V*=2167.67(30) Å3, **=86.74(1)°, **=71.98(1)°, **=84.51(1)°, *Z*=1, *ρ*calcd=1.948 mg/m3, *R*1= 0.025, *wR*2= 0.068 (37635 reflections total, 9553 unique, 7993 (*I*>2(*I*)), goodness-of-fit =1.06. The data collections were performed for **1** at 173 Kon a Bruker SMART diffractometer and for **2** at 210K on a STOE IPDS diffractometer, using MoK (=0.71073), by **-scan method, within limits 1.74<θ<25.00 for **1** and 3.03<θ<25.68 for **2**. An empirical adsorption correction was applied using the SADABS program. The structure was solved by direct method and refined using full-matrix least squares on *F*2 (SHELXL). In **1** all H-atoms were placed in calculated positions but in **2** some of H-atoms were placed in calculated positions and others were allowed to ride on their respective parent atoms. CCDC-201155-201156 in the Cambridge Crystallographic Data Centre contains supplementary crystallographic data for the structures of this paper. Copies of the data can be obtained free of charge on application to CCDC, 12 Union Road, Cambridge CB21EZ, UK (e-mail:deposit@ccdc.cam.ac.uk).

(3) The structure of compound [MV](NCS)2

**
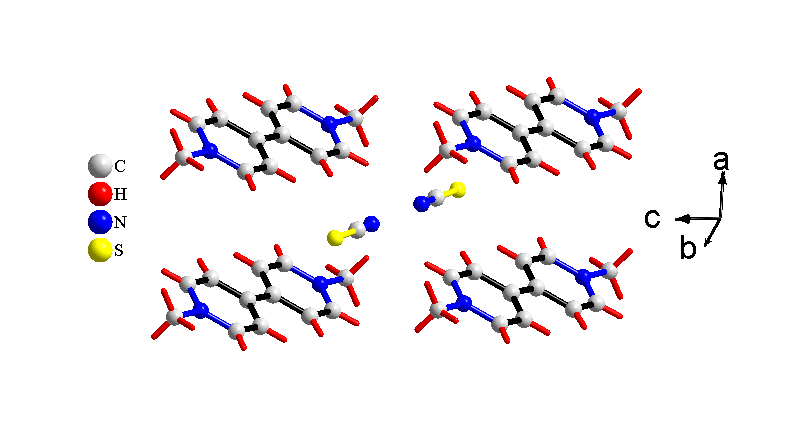
**

Table S1 Crystallographic Data for [MV](NCS)2

____________________________________________________________

T (K) 173(2)

Empirical formula C14 H14 N4 S2

Formula weight 302.41

a, Å 5.5395(5)

b, Å 7.5164(6)

c, Å 9.3414(8)

alpha 91.154(2)

beta 102.372(2)

gamma 105.0000(10)

V Å3 365.79(5)

Symmetry triclinic

Space group P-1 (no. 2)

wavelength 0.7107

no. of unique reflections 1870

Z 1

Density, calculated 1.373 g/cm3

R 0.0359

Rw 0.1028

____________________________________________________________

(4) IR spectra for compound **1,** compound **2** and Methylviologen dichloride

(5) EPR spectra for compound **1** and compound **2** at room temperature
